# Supplementary material for: Risk Awareness and Attitude of German Farmers towards Biosecurity Measures
Source: MDPI journal article supplement (doi:10.3390/ani14071102), 2024-04-04
Supplement: s1 [file s1]

Themes and corresponding codes from the open text field question about further thoughts on biosecurity.

| Theme                         | Code(s)                                                                       |
|-------------------------------|-------------------------------------------------------------------------------|
| Uncertainty about biosecurity | Need for valid information                                                    |
|                               | Reliable instructions in advance                                              |
|                               | Need for reasonable ASF control                                               |
|                               | Everything possible is implemented, but still uncertainties (e.g. wild-birds) |
|                               | There will always be unpredictability                                         |
|                               | There is no absolute safety                                                   |
| Personal responsibility       | Concepts on paper are of no use on their own                                  |
|                               | Consistently implementation in practice                                       |
|                               | Starting with oneself; not pointing the finger at others first                |
| Further information           | Grazing with mobile shelter                                                   |
|                               | Home slaughtering                                                             |
|                               | No problems during many decades                                               |
|                               | The farm is now shut down                                                     |
| Free-range holdings           | The biggest thread is the neighboring free-range holding                      |

|                                     |                                                                                   |
|-------------------------------------|-----------------------------------------------------------------------------------|
|                                     | In free-range holdings the biggest threat are wild-birds                          |
|                                     | Biosecurity is hard to implement in free-range holdings                           |
| Design of the questionnaire         | Setting options should be reconsidered                                            |
|                                     | Additional category for extensive beef cattle breed                               |
|                                     | Last statement of the Likert-Scale is unclear about location of disease outbreak  |
| Feasibility of biosecurity measures | Evolved structures hinder implementation of measures                              |
|                                     | Compromise between different requirements (time-workload, costs-yield)            |
|                                     | Concepts are not implemented                                                      |
| Veterinary officer                  | Some veterinary officers don't know what to do                                    |
|                                     | Local veterinary officers are doing a good job                                    |
|                                     | Cooperation and active exchange with veterinary officers                          |
|                                     | Not enough time for inspections                                                   |
| Unauthorized entry                  | Unauthorized access to the premises despite the fact that the premises are closed |
|                                     | Unauthorized intrusion of NGOs                                                    |
| Psychological impact                | Self-reproach in the event of an outbreak on one's farm                           |
|                                     | Disease protection is self-protection                                             |

Open-communication is needed

Some prefer to remain-silent

Mobile stable association

Mobile stable association supplements very good information material

Mobile stable association is good at support

Hobby husbandry

Hobby holders display no personal responsibility

Discrepancies in the family

Other family members do not see the relevance of biosecurity

Importance of biosecurity

Very important for every farm
