# Supplementary material for: Risk Awareness and Attitude of German Farmers towards Biosecurity Measures
Source: MDPI journal article supplement (doi:10.3390/ani14071102), 2024-04-04
Supplement: s1 [file s1]

# Starting page

**ÖTiKlis**

0% completed

**Survey about biosecurity**

The ÖTiKlis project is a joint research project of the Friedrich-Loeffler-Institute and the Weihenstephan-Triesdorf University of Applied Sciences. The aim is to investigate the compatibility of ecology, animal health and animal disease control. For more information on the project, please visit the project page.

In this anonymous survey we ask you to share your experience as well as your opinion on biosecurity! You will be asked a total of ten short questions. The estimated completion time is five to ten minutes.

The results of the survey will be used to create recommendations for action and measures to improve biosecurity on livestock farms. By participating in the survey, you are making an important contribution to this effort. Thank you for your assistance.

In addition to the survey presented here, we are looking for livestock farms to participate in a biosecurity survey. Information on how to participate can be found further down the page. We look forward to hearing from you!

**Start survey!**

**Farms wanted to participate in the study!**

**Within the framework of the ÖTiKlis project, a comparative study on the topic of biosecurity in conventional and organic animal husbandry is planned.**

**If you are interested in participating, please contact us!**

We are currently looking for pig and poultry farms of all types to participate. A study with cattle farms is 

**Contact details**

ÖTiKlis, Friedrich-Loeffler-Institut, Bundesforschungsinstitut für Tiergesundheit – 2023



20% completed

### General information

**1. How many years of experience do you have in keeping farm animals?**

[Please choose] ▼

**2. What type(s) of animal husbandry do you have on your farm?**

☐ conventional husbandry

☐ conventional husbandry with outdoor climate stimulus

☐ conventional husbandry with outdoor access

☐ biological/ecological animal husbandry (EU-Organic-Label according to the EU-Organic-Base Regulation (EU) 2018/848)

**3. What livestock do you keep on your farm?**

☐ Cattle

☐ Pigs

☐ Chicken

☐ Other poultry

☐ Sheep

☐ Goats

☐ Ungulates

**4. In which region is your farm located?**

[Please choose] ▼

[Back](#) [Next](#)

ÖTiKlis, Friedrich-Loeffler-Institut, Bundesforschungsinstitut für Tiergesundheit – 2023

## Answer options

**1. How many years of experience do you have in keeping farm animals?**

[Please choose] ▼

[Please choose]

< 5 years

5-10 years

11-20 years

< 20 years

**2. What type(s) of animal husbandry do you have on your farm?**

☐ conventional husbandry

Example:

**3. What livestock do you keep on your farm?**

☒ **Cattle**

☒ Dairy cattle

☐ 1 - 19 animals

☐ 20 - 99 animals

☒ 100 or more animals

☐ Beef cattle

Scheme:

| Category       | Subcategory       | Number of animals | Category      | Subcategory  | Number of animals |
|----------------|-------------------|-------------------|---------------|--------------|-------------------|
| Cattle         | Dairy cattle      | 1 -19             | Chicken       | Broiler      | 1 -99             |
|                |                   | 20 - 99           |               |              | 100 - 999         |
|                |                   | ≥ 100             |               |              | ≥ 1.000           |
|                | Beef cattle       | 1 -19             |               | Layer        | 1 -99             |
|                |                   | 20 - 99           |               |              | 100 - 999         |
|                |                   | ≥ 100             |               |              | ≥ 1.000           |
| Pigs           | Sows              | 1 -99             | Other poultry | Dual-purpose | 1 -99             |
|                |                   | 100 - 999         |               |              | 100 - 999         |
|                |                   | ≥ 1.000           |               |              | ≥ 1.000           |
|                | Suckling piglets  | 1 -99             |               | Turkeys      | 1 -99             |
|                |                   | 100 - 999         |               |              | 100 - 999         |
|                |                   | ≥ 1.000           |               |              | ≥ 1.000           |
|                | Fattening piglets | 1 -99             | Geese         | 1 -99        |                   |
|                |                   | 100 - 999         |               | 100 - 999    |                   |
|                |                   | ≥ 1.000           |               | ≥ 1.000      |                   |
|                | Young pigs        | 1 -99             | Ducks         | 1 -99        |                   |
|                |                   | 100 - 999         |               | 100 - 999    |                   |
|                |                   | ≥ 1.000           |               | ≥ 1.000      |                   |
| Fattening pigs | 1 -99             | Sheep             | 1 -19         |              |                   |
|                | 100 - 999         |                   | 20 - 99       |              |                   |
|                | ≥ 1.000           |                   | ≥ 100         |              |                   |
| Boar           | 1 -9              | Goats             | 1 -19         |              |                   |
|                | ≥ 10              |                   | 20 - 99       |              |                   |
|                |                   |                   | ≥ 100         |              |                   |
|                |                   |                   | Ungulates     | Horse        |                   |
|                |                   |                   |               | Donkey       |                   |
|                |                   |                   |               | Mule         |                   |

#### 4. In which region is your farm located?

[Please choose] ▼

biological/ecological animal husbandry (EU-Organic)

- [Please choose]
- Baden-Württemberg
  - Bavaria
  - Berlin
  - Brandenburg
  - Bremen
  - Hamburg
  - Hesse
  - Mecklenburg-Western Pomerania
  - Lower Saxony
  - North Rhine-Westphalia
  - Rhineland-Palatinate
  - Saarland
  - Saxony-Anhalt
  - Saxony
  - Schleswig-Holstein
  - Thuringia
- 
- Austria
  - Switzerland

[Please choose] ▼

on your farm?

m located?



40% completed

## State of biosecurity

**5. Please indicate how you feel about the following statements.**

| Does not apply        | Does rather not apply | Neutral               | Does rather apply     | Does apply            |                                                                                                                                             |
|-----------------------|-----------------------|-----------------------|-----------------------|-----------------------|---------------------------------------------------------------------------------------------------------------------------------------------|
| <input type="radio"/> | I consider biosecurity measures on my farm important.                                                                                       |
| <input type="radio"/> | The biosecurity concept on my farm is well thought out and offers the best possible protection against the introduction of animal diseases. |
| <input type="radio"/> | The adherence of the biosecurity concept by all employees is controlled frequently.                                                         |
| <input type="radio"/> | I am familiar with the measures officially appointed in case of an animal disease outbreak.                                                 |
| <input type="radio"/> | In case of an animal disease outbreak, my farms existence is in danger.                                                                     |

**6. From which of the following institutions or persons did you obtain information during the preparation and further development of the biosafety concept of your operation?**

- ☐ Other farmers
- ☐ Producers' association
- ☐ Chamber of Agriculture
- ☐ Certification body
- ☐ Veterinarian
- ☐ Animal health service
- ☐ Animal disease fund
- ☐ Other, being: \_\_\_\_\_

☐ There is no biosecurity concept.

**7. Have you reviewed your farm's biosecurity approach against guidelines/recommendations, etc.?**

[Please choose] ▼

Back
Next

## Answer options

**7. Have you reviewed your farm's biosecurity approach against guidelines/recommendations, etc.?**

[Please choose] ▼

[Please choose]

No

Yes

with the help of the veterinarian

with the help of an institution

with the help of an online-tool

Next



40% completed

### Assessment of the hazard situation

**1. Please assign the statements to the 3 most important entry sources!**

A maximum of 3 entry sources per statement can be selected.

For assignment, please click first on one of the statements and then on the corresponding entry source.

Marked entries can be removed by clicking on them again.



Here I see a high risk of disease introduction into my farm!

Here my farm is very well positioned in terms of biosecurity!

Next

ÖTiKlis, Friedrich-Loeffler-Institut, Bundesforschungsinstitut für Tiergesundheit – 2023

### Filled out example for page 3

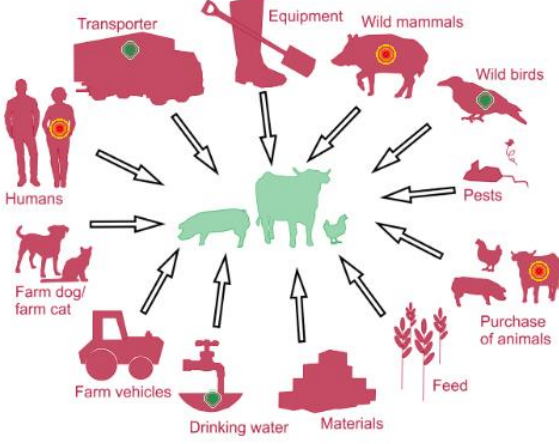

Here I see a high risk of disease introduction into my farm!

Here my farm is very well positioned in terms of biosecurity!

Next



ÖTiKlis

70% completed

### Options for improvement

#### 2. What biosecurity-related offerings would be of interest to you?

|                                                                      |                                                            |                                        |
|----------------------------------------------------------------------|------------------------------------------------------------|----------------------------------------|
| Regular information on the current state of animal disease outbreaks | Short fact sheet with the most effective action measures   | Detailed action guideline              |
| Lecture on the topic                                                 | Workshop with the possibility of interactive participation | Training of employees on site          |
| Site visit to verify biosecurity on site                             | Mobile app with information and instructions for action    | Others, being:<br><input type="text"/> |

I don't see a need on my farm.

#### 3. Anything else you want to tell us about biosecurity on your farm?

[Back](#)[Send data!](#)

ÖTiKlis, Friedrich-Loeffler-Institut, Bundesforschungsinstitut für Tiergesundheit – 2023

## Last page

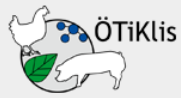

### **Thank you very much for your participation!**

Your answers will help us to better assess the attitudes and experiences of German agriculture on the topic of biosecurity.

The results of the survey will be published on the ÖTiKlis project page after the end of the survey period.

We would like to thank you very much for your assistance.

ÖTiKlis, Friedrich-Loeffler-Institut, Bundesforschungsinstitut für Tiergesundheit – 2023
